# Supplementary material
Source: PubMed Central journal article supplement (PMC4054150)
Supplement: AEM.00418-14_zam999105418so1.pdf [file AEM.00418-14_zam999105418so1.pdf]

TABLE S1 Association among the virulence genes which were reported on various UPEC pathogenicity islands (PAIs)

| Virulence factors/description                | Virulence genes   | Association <sup>a</sup> between UPEC virulence genes (n <sup>b</sup> ) |                          |             |                |             |             |               |                   |                     |             |             |               |               |             |             |                                |               |             |               |            |             |             |            |             |   |  |
|----------------------------------------------|-------------------|-------------------------------------------------------------------------|--------------------------|-------------|----------------|-------------|-------------|---------------|-------------------|---------------------|-------------|-------------|---------------|---------------|-------------|-------------|--------------------------------|---------------|-------------|---------------|------------|-------------|-------------|------------|-------------|---|--|
|                                              |                   | Adhesins                                                                |                          |             |                |             |             |               | Capsule           | Iron uptake systems |             |             |               |               |             | Toxins      | Haemolysins and hemagglutinins |               |             | Miscellaneous |            |             |             |            |             |   |  |
|                                              |                   | <i>papA</i>                                                             | <i>papC</i>              | <i>papG</i> | <i>pixA</i>    | <i>sfaA</i> | <i>sfaD</i> | <i>sfaHII</i> | <i>F17(a-d)-A</i> | <i>kpsM(II)</i>     | <i>iroN</i> | <i>fyuA</i> | <i>irp(1)</i> | <i>irp(2)</i> | <i>iucD</i> | <i>iutA</i> | <i>chuA</i>                    | <i>cnf(1)</i> | <i>sat</i>  | <i>hlyA</i>   | <i>vat</i> | <i>hraI</i> | <i>malX</i> | <i>usp</i> |             |   |  |
| (233)                                        | (139)             | (119)                                                                   | (7)                      | (12)        | (42)           | (24)        | (4)         | (150)         | (66)              | (125)               | (127)       | (174)       | (55)          | (75)          | (130)       | (46)        | (67)                           | (85)          | (90)        | (84)          | (142)      | (100)       |             |            |             |   |  |
| <b>Adhesins</b>                              |                   |                                                                         |                          |             |                |             |             |               |                   |                     |             |             |               |               |             |             |                                |               |             |               |            |             |             |            |             |   |  |
| P-fimbriae                                   | <i>papA</i>       | – <sup>c</sup>                                                          |                          |             |                |             |             |               |                   |                     |             |             |               |               |             |             |                                |               |             |               |            |             |             |            |             |   |  |
|                                              | <i>papC</i>       | 0.40                                                                    | –                        |             |                |             |             |               |                   |                     |             |             |               |               |             |             |                                |               |             |               |            |             |             |            |             |   |  |
|                                              | <i>papG</i>       | 0.35                                                                    | <b>0.775<sup>d</sup></b> | –           |                |             |             |               |                   |                     |             |             |               |               |             |             |                                |               |             |               |            |             |             |            |             |   |  |
| Pilus P                                      | <i>pixA</i>       |                                                                         | 0.17                     | 0.15        | –              |             |             |               |                   |                     |             |             |               |               |             |             |                                |               |             |               |            |             |             |            |             |   |  |
| S-fimbriae                                   | <i>sfaA</i>       | 0.12                                                                    | 0.19                     | 0.26        | N <sup>e</sup> | –           |             |               |                   |                     |             |             |               |               |             |             |                                |               |             |               |            |             |             |            |             |   |  |
|                                              | <i>sfaD</i>       | 0.14                                                                    | 0.22                     | 0.28        | 0.26           | 0.26        | –           |               |                   |                     |             |             |               |               |             |             |                                |               |             |               |            |             |             |            |             |   |  |
|                                              | <i>sfaHII</i>     |                                                                         | 0.21                     | 0.25        | 0.28           | <b>0.57</b> | <b>0.56</b> | –             |                   |                     |             |             |               |               |             |             |                                |               |             |               |            |             |             |            |             |   |  |
| F17-fimbriae                                 | <i>F17(a-d)-A</i> |                                                                         |                          |             | N              | 0.42        | 0.18        |               | –                 |                     |             |             |               |               |             |             |                                |               |             |               |            |             |             |            |             |   |  |
| <b>Capsule</b>                               |                   |                                                                         |                          |             |                |             |             |               |                   |                     |             |             |               |               |             |             |                                |               |             |               |            |             |             |            |             |   |  |
| Group II                                     | <i>kpsM(II)</i>   | 0.34                                                                    | <b>0.633</b>             | <b>0.59</b> | 0.16           | 0.21        | 0.36        | 0.30          | –                 |                     |             |             |               |               |             |             |                                |               |             |               |            |             |             |            |             |   |  |
| <b>Iron uptake systems</b>                   |                   |                                                                         |                          |             |                |             |             |               |                   |                     |             |             |               |               |             |             |                                |               |             |               |            |             |             |            |             |   |  |
| <i>E. coli</i> siderophore                   | <i>iroN</i>       | 0.14                                                                    | 0.27                     | 0.28        | 0.29           | 0.35        | <b>0.67</b> | 0.47          | 0.41              | –                   |             |             |               |               |             |             |                                |               |             |               |            |             |             |            |             |   |  |
| Yersiniabactin                               | <i>fyuA</i>       | 0.30                                                                    | 0.30                     | 0.32        |                |             |             |               | 0.28              | 0.27                | 0.20        | –           |               |               |             |             |                                |               |             |               |            |             |             |            |             |   |  |
|                                              | <i>irp(1)</i>     | 0.26                                                                    | 0.34                     | 0.40        |                |             |             |               | 0.29              | 0.32                | 0.25        | <b>0.84</b> | –             |               |             |             |                                |               |             |               |            |             |             |            |             |   |  |
|                                              | <i>irp(2)</i>     | 0.21                                                                    | 0.45                     | 0.46        |                |             | 0.15        | 0.34          | 0.21              | 0.47                | 0.30        | <b>0.70</b> | <b>0.72</b>   | –             |             |             |                                |               |             |               |            |             |             |            |             |   |  |
| Aerobactin                                   | <i>iucD</i>       |                                                                         | 0.24                     | 0.30        | N              | N           | 0.12        | N             | 0.29              | 0.16                | 0.35        | 0.33        | 0.34          | –             |             |             |                                |               |             |               |            |             |             |            |             |   |  |
|                                              | <i>iutA</i>       | 0.11                                                                    | 0.37                     | 0.34        | N              | N           |             |               | N                 | 0.36                | 0.14        | 0.21        | 0.25          | 0.30          | <b>0.73</b> | –           |                                |               |             |               |            |             |             |            |             |   |  |
| heme receptor                                | <i>chuA</i>       | 0.27                                                                    | <b>0.574</b>             | <b>0.59</b> |                |             | 0.14        | 0.43          | 0.25              | <b>0.69</b>         | 0.35        | 0.44        | <b>0.55</b>   | <b>0.58</b>   | 0.37        | 0.37        | –                              |               |             |               |            |             |             |            |             |   |  |
| <b>Toxins</b>                                |                   |                                                                         |                          |             |                |             |             |               |                   |                     |             |             |               |               |             |             |                                |               |             |               |            |             |             |            |             |   |  |
| Cytotoxic necrotizing factor type 1          | <i>cnf(1)</i>     | 0.15                                                                    | 0.31                     | 0.39        | 0.24           | 0.29        | <b>0.71</b> | 0.46          | 0.43              | <b>0.52</b>         | 0.26        | 0.32        | 0.38          | 0.15          | 0.07        | 0.44        | –                              |               |             |               |            |             |             |            |             |   |  |
| Secreted autotransporter toxin               | <i>sat</i>        | 0.20                                                                    | 0.37                     | 0.42        | N              | N           | 0.14        | N             | N                 | 0.33                |             |             | 0.27          | 0.32          | 0.34        | 0.46        | <b>0.57</b>                    | 0.41          | 0.16        |               |            |             |             |            |             |   |  |
| <b>Haemolysins and hemagglutinins</b>        |                   |                                                                         |                          |             |                |             |             |               |                   |                     |             |             |               |               |             |             |                                |               |             |               |            |             |             |            |             |   |  |
| α-hemolysin                                  | <i>hlyA</i>       |                                                                         | 0.35                     | 0.42        | 0.25           | 0.33        | <b>0.50</b> | 0.47          | 0.19              | 0.42                | <b>0.53</b> |             |               | 0.17          | 0.27        |             |                                | 0.30          | <b>0.66</b> | –             |            |             |             |            |             |   |  |
| Haemoglobin protease                         | <i>vat</i>        | 0.28                                                                    | <b>0.51</b>              | <b>0.56</b> | 0.19           | 0.17        | <b>0.54</b> | 0.25          |                   |                     | <b>0.61</b> | 0.49        | 0.40          | 0.49          | <b>0.52</b> |             |                                | 0.12          | <b>0.67</b> | <b>0.56</b>   | 0.21       | 0.40        | –           |            |             |   |  |
| Heat resistant agglutinin 1                  | <i>hraI</i>       | 0.15                                                                    | 0.41                     | 0.4397      | 0.25           | 0.33        | <b>0.57</b> | 0.48          |                   |                     | 0.42        | <b>0.59</b> | 0.17          | 0.25          | 0.31        |             |                                | 0.33          | <b>0.63</b> |               |            | <b>0.72</b> | 0.45        | –          |             |   |  |
| <b>Miscellaneous</b>                         |                   |                                                                         |                          |             |                |             |             |               |                   |                     |             |             |               |               |             |             |                                |               |             |               |            |             |             |            |             |   |  |
| Maltose and glucose-specific IIABC component | <i>malX</i>       | 0.20                                                                    | <b>0.54</b>              | 0.46        | 0.17           | 0.22        | 0.42        | 0.32          |                   |                     | <b>0.66</b> | 0.46        | 0.17          | 0.23          | 0.36        |             |                                | 0.494         | 0.46        |               |            | 0.46        | <b>0.67</b> | 0.50       | –           |   |  |
| Uropathogenic specific protein               | <i>usp</i>        | 0.25                                                                    | <b>0.527</b>             | <b>0.53</b> | 0.18           | 0.15        | 0.48        | 0.27          |                   |                     | <b>0.61</b> | 0.42        | 0.36          | 0.41          | 0.50        |             |                                | 0.12          | <b>0.62</b> | 0.49          | 0.20       | 0.41        | <b>0.82</b> | 0.49       | <b>0.72</b> | – |  |

<sup>a</sup> Pair-wise (a total of 276 pairs of genes) correlation between VGs was determined using the Phi-coefficient ( $\phi$ ) of association. Significance level:  $P > 0.05$ . Only those associations which were positive and significant are presented here.

<sup>b</sup> Value in the parentheses represents the number of isolates possessing the indicated gene in a total of 323 screen-positive isolates. The *cswA* (CS12-fimbriae) gene was excluded in the analysis since not a single isolate contained the gene.

<sup>c</sup> –: Coefficient of association was not computed among the same pairs of genes.

<sup>d</sup> The gene pairs (a total of 41 pairs) with strong association ( $\phi > 0.50$ ) were bold faced.

<sup>e</sup> N: Negative association and statistically not significant (12 pairs of genes).

TABLE S2 Change in the prevalence of UPEC virulence gene in non-disinfected and UV or PAA disinfected effluent samples

| Isolates or UPEC virulence factors/genes (VFs/VGs) | No. of isolates possessing the UPEC virulence gene |             |                             |               |                                                                 |                 |             |                             |               |                                                                 |
|----------------------------------------------------|----------------------------------------------------|-------------|-----------------------------|---------------|-----------------------------------------------------------------|-----------------|-------------|-----------------------------|---------------|-----------------------------------------------------------------|
|                                                    | UV                                                 |             |                             |               |                                                                 | PAA             |             |                             |               |                                                                 |
|                                                    | Non-Disinfected                                    | Disinfected | % change (+/-) <sup>a</sup> | Ln-odds ratio | Significance of difference with respect to average <sup>b</sup> | Non-Disinfected | Disinfected | % change (+/-) <sup>a</sup> | Ln-odds ratio | Significance of difference with respect to average <sup>b</sup> |
| Isolates                                           |                                                    |             |                             |               |                                                                 |                 |             |                             |               |                                                                 |
| Total isolates                                     | 370                                                | 370         | NA                          | NA            | NA <sup>c</sup>                                                 | 423             | 434         | NA                          | NA            | NA                                                              |
| Screen +ve                                         | 83                                                 | 66          | -20.5                       | -0.287        | -                                                               | 99              | 75          | -26.2                       | -0.380        | +                                                               |
| UPEC                                               | 36                                                 | 17          | -52.8                       | -0.806        | +                                                               | 39              | 22          | -45.0                       | -0.643        | +                                                               |
| Non-UPEC                                           | 47                                                 | 49          | +4.26                       | 0.048         | -                                                               | 60              | 53          | -13.9                       | -0.172        | -                                                               |
| UPEC VFs/VGs                                       |                                                    |             |                             |               |                                                                 |                 |             |                             |               |                                                                 |
| Adherence                                          |                                                    |             |                             |               |                                                                 |                 |             |                             |               |                                                                 |
| <i>papA</i> <sup>e</sup>                           | 60                                                 | 44          | -7.78                       | -0.266        | -                                                               | 73              | 56          | +1.26                       | 0.049         | -                                                               |
| <i>papC</i>                                        | 48                                                 | 26          | -31.9                       | -0.747        | -                                                               | 43              | 22          | -32.5                       | -0.615        | -                                                               |
| <i>papG</i>                                        | 37                                                 | 19          | -35.4                       | -0.688        | -                                                               | 40              | 23          | -24.1                       | -0.427        | -                                                               |
| <i>pixA</i>                                        | 4                                                  | 1           | -68.6                       | -1.19         | -                                                               | 1               | 1           | +32.0                       | 0.281         | -                                                               |
| Average                                            | 37                                                 | 23          | -24.0                       | -0.454        | NA                                                              | 39              | 26          | -14.2                       | -0.243        | NA                                                              |
| Capsule                                            |                                                    |             |                             |               |                                                                 |                 |             |                             |               |                                                                 |
| <i>kpsM(II)</i>                                    | 52                                                 | 27          | -34.7                       | -0.885        | -                                                               | 45              | 26          | -23.7                       | -0.451        | -                                                               |
| <i>kpsM(III)</i>                                   | 1                                                  | 1           | +25.8                       | 0.232         | -                                                               | 2               | 2           | +32.0                       | 0.284         | -                                                               |
| Average                                            | 26.5                                               | 14          | -33.6                       | -0.555        | NA                                                              | 23.5            | 14          | -21.4                       | -0.305        | NA                                                              |
| Iron acquisition systems                           |                                                    |             |                             |               |                                                                 |                 |             |                             |               |                                                                 |
| With PAI IV536                                     |                                                    |             |                             |               |                                                                 |                 |             |                             |               |                                                                 |
| <i>fyuA</i>                                        | 17                                                 | 19          | +40.6                       | 0.451         | +                                                               | 45              | 44          | +29.1                       | 0.533         | +                                                               |
| <i>irp(1)</i>                                      | 19                                                 | 20          | +32.4                       | 0.382         | +                                                               | 45              | 43          | +26.1                       | 0.478         | +                                                               |
| <i>irp(2)</i>                                      | 46                                                 | 25          | -31.7                       | -0.712        | -                                                               | 54              | 49          | +20.0                       | 0.451         | +                                                               |
| Average (without <i>irp(2)</i> )                   | 18.0                                               | 19.5        | +36.2                       | 0.415         | NA                                                              | 45.0            | 43.5        | +27.6                       | 0.505         | NA                                                              |
| Without PAI IV536                                  |                                                    |             |                             |               |                                                                 |                 |             |                             |               |                                                                 |
| <i>iroN</i>                                        | 25                                                 | 14          | -29.6                       | -0.471        | -                                                               | 17              | 10          | -22.4                       | -0.298        | -                                                               |
| <i>iucD</i>                                        | 16                                                 | 9           | -29.3                       | -0.414        | -                                                               | 19              | 11          | -23.6                       | -0.323        | -                                                               |
| <i>iutA</i>                                        | 25                                                 | 15          | -24.5                       | -0.382        | -                                                               | 25              | 10          | -47.2                       | -0.787        | -                                                               |
| <i>sitA</i>                                        | 60                                                 | 38          | -20.4                       | -0.653        | -                                                               | 55              | 30          | -28.0                       | -0.629        | -                                                               |
| <i>sitD</i>                                        | 35                                                 | 25          | -10.2                       | -0.179        | -                                                               | 51              | 27          | -30.1                       | -0.636        | -                                                               |
| Average                                            | 32.2                                               | 20.2        | -21.1                       | -0.363        | NA                                                              | 33.4            | 17.6        | -30.4                       | -0.507        | NA                                                              |
| Toxins                                             |                                                    |             |                             |               |                                                                 |                 |             |                             |               |                                                                 |
| <i>hlyA</i>                                        | 33                                                 | 11          | -58.1                       | -1.19         | -                                                               | 23              | 18          | +3.3                        | 0.043         | -                                                               |
| <i>vat</i>                                         | 27                                                 | 12          | -44.1                       | -0.775        | -                                                               | 33              | 18          | -28.0                       | -0.460        | -                                                               |
| <i>cnf(1)</i>                                      | 13                                                 | 6           | -42.0                       | -0.619        | -                                                               | 13              | 14          | +42.2                       | 0.418         | -                                                               |
| <i>cnf(2)</i>                                      | 0                                                  | 0           | NC                          | NC            | NC <sup>d</sup>                                                 | 2               | 0           | -100                        | NC            | NC                                                              |
| <i>sat</i>                                         | 14                                                 | 12          | +7.8                        | 0.091         | -                                                               | 20              | 21          | +38.6                       | 0.429         | -                                                               |
| Average                                            | 17.4                                               | 8.2         | -40.7                       | -0.626        | NA                                                              | 18.2            | 14.2        | +3.0                        | 0.036         | NA                                                              |
| Miscellaneous                                      |                                                    |             |                             |               |                                                                 |                 |             |                             |               |                                                                 |
| <i>b(1432)</i>                                     | 14                                                 | 6           | -46.1                       | -0.708        | -                                                               | 13              | 6           | -39.1                       | -0.553        | -                                                               |
| <i>deoK</i>                                        | 30                                                 | 15          | -37.1                       | -0.655        | -                                                               | 32              | 22          | -9.3                        | -0.140        | -                                                               |
| <i>gimB(orf1)</i>                                  | 19                                                 | 7           | -53.7                       | -0.917        | -                                                               | 12              | 12          | +32.0                       | 0.323         | -                                                               |
| <i>malX</i>                                        | 53                                                 | 23          | -45.4                       | -1.19         | +                                                               | 41              | 25          | -19.5                       | -0.346        | -                                                               |
| <i>pic</i>                                         | 14                                                 | 6           | -46.1                       | -0.708        | -                                                               | 10              | 5           | -34.0                       | -0.453        | -                                                               |
| <i>usp</i>                                         | 27                                                 | 15          | -30.1                       | -0.494        | -                                                               | 38              | 20          | -30.5                       | -0.538        | -                                                               |
| <i>chuA</i>                                        | 40                                                 | 25          | -21.4                       | -0.422        | -                                                               | 42              | 23          | -27.7                       | -0.510        | -                                                               |
| Average                                            | 28.1                                               | 13.9        | -38.1                       | -0.658        | NA                                                              | 26.9            | 16.1        | -20.7                       | -0.306        | NA                                                              |

<sup>a</sup> % change: +, Increase; -, decrease<sup>b</sup> Statistical significance for the change of frequency of isolates/gene:  $P < 0.05$ , +;  $P > 0.05$ , -<sup>c</sup> NA: Not applicable<sup>d</sup> NC: Not computed due to the low frequency<sup>e</sup> bolded virulence genes (VGs) are present on UPEC pathogenicity islands
